# Supplementary material
Source: Hindawi journal article supplement (doi:10.1155/2010/953272)
Supplement: f1 [file 953272.f1.pdf]

1 **Feline T-cell receptor  $\gamma$  V- and J-region sequences retrieved from the Trace Archive**  
 2 **and from transcriptome analysis of cats – Supplemental Material**

3

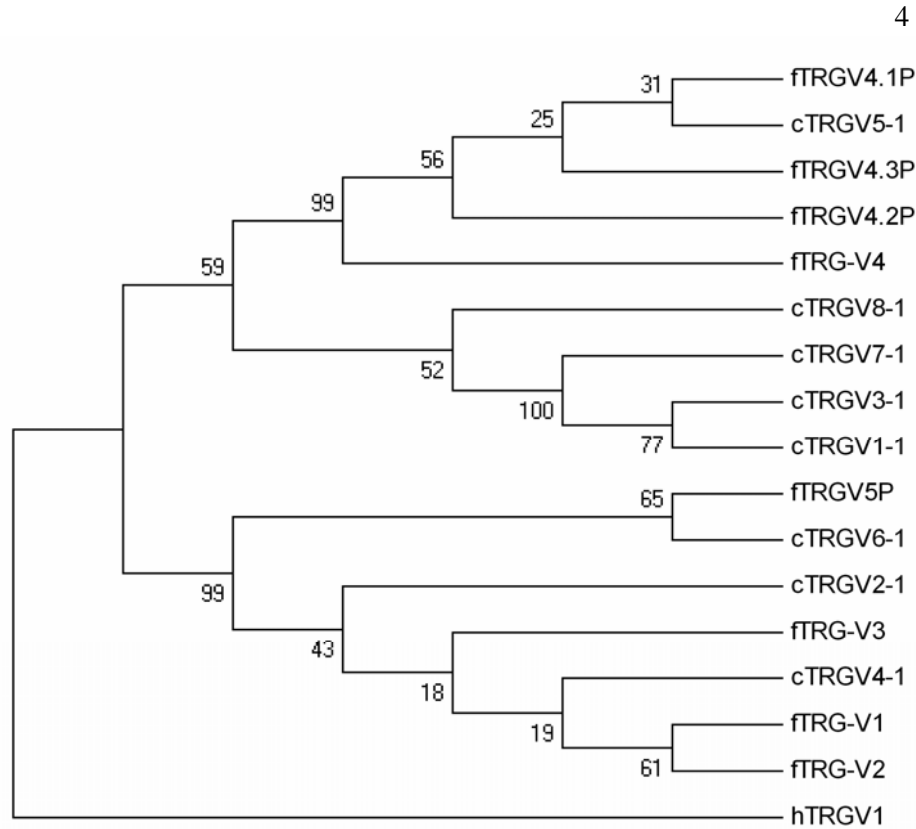

15

16 **Supplemental Figure:** Phylogenetic dendrogram of canine and feline TRGV genes with human  
 17 TRGV1 as out-group. From the canine genes only one member of each subgroup was included. Feline  
 18 subgroup one (fTRGV1-3) is most closely related to canine subgroup 4 (cTRGV4-1) and 2 (cTRGV2-  
 19 1). Canine subgroups 1, 3, 7 and 8 seem to have no known homologues within the feline repertoire.  
 20 Feline subgroup 2 (fTRGV4) is most closely related to canine subgroup 5 (cTRGV5-1) and fTRGV5P  
 21 is most closely related to canine subgroup 6 (cTRGV6-1). Maximum parsimony, bootstrap values are  
 22 indicated next to the corresponding node.
